# Supplementary material for: Shortages of Medicines to Treat COVID-19 Symptoms during the First Wave and Fourth Wave: Analysis of Notifications Reported to Registers in Austria, Italy, and Spain
Source: MDPI journal article supplement (doi:10.3390/pharmacy11040120), 2023-07-21
Supplement: s1 [file s1]

## Supplementary Materials

### Supplementary File S1.

**Medicines (listed by active substance) recommended in clinical guidelines as of March 2020 to treat COVID-19 symptoms.**

| Active substance              |         | Guideline |         |       |       |
|-------------------------------|---------|-----------|---------|-------|-------|
| Name                          | ATC-5   | PAHO      | Austria | Italy | Spain |
| ranitidine                    | A02BA02 | √         |         |       |       |
| omeprazole                    | A02BC01 | √         |         |       |       |
| atropine                      | A03BA01 | √         |         |       |       |
| metoclopramide                | A03FA01 | √         |         |       |       |
| ondansetron                   | A04AA01 | √         |         |       |       |
| heparin                       | B01AB01 | √         |         |       |       |
| enoxaparin                    | B01AB05 | √         |         |       |       |
| sodium chloride <sup>1</sup>  | B05XA0  | √         | √       |       |       |
| potassium lactate             | B05XA15 | √         |         |       |       |
| norepinephrine                | C01CA03 | √         | √       |       |       |
| dobutamine                    | C01CA07 | √         | √       |       | √     |
| epinephrine                   | C01CA24 | √         |         |       |       |
| milrinone                     | C01CE02 |           | √       |       |       |
| levosimendan                  | C01CX08 |           | √       |       |       |
| chlorhexidine                 | D08AC02 | √         |         |       |       |
| povidone-iodine               | D08AG02 | √         |         |       |       |
| ethanol                       | D08AX08 | √         |         |       |       |
| dexamethasone                 | H02AB02 |           |         | √     |       |
| methylprednisolone            | H02AB04 |           |         |       | √     |
| hydrocortisone                | H02AB09 | √         | √       |       | √     |
| amoxicillin / clavulanic acid | J01CR02 | √         |         |       | √     |
| piperacillin / tazobactam     | J01CR05 | √         |         |       |       |
| ceftazidime                   | J01DD02 | √         |         |       | √     |
| ceftriaxone                   | J01DD04 | √         |         |       | √     |
| cefditoren                    | J01DD16 |           |         |       | √     |
| meropenem                     | J01DH02 | √         |         |       |       |
| ceftaroline                   | J01DI02 |           |         |       | √     |
| clarithromycin                | J01FA09 |           |         |       | √     |
| azithromycin                  | J01FA10 | √         |         |       | √     |
| amikacin                      | J01GB06 | √         |         |       |       |
| levofloxacin                  | J01MA12 |           |         |       | √     |
| moxifloxacin                  | J01MA14 |           |         |       | √     |
| vancomycin                    | J01XA01 | √         |         |       |       |
| amphotericin B                | J02AA01 | √         |         |       |       |
| remdesivir                    | J05AB16 |           | √       | √     | √     |
| oseltamivir                   | J05AH02 | √         |         |       |       |
| Lopinavir / ritonavir         | J05AR10 |           | √       | √     | √     |
| favipiravir                   | J05AX27 |           | √       |       |       |
| interferon beta-1b            | L03AB08 |           |         |       | √     |
| anakinra                      | L04AC03 |           |         |       | √     |
| tocilizumab                   | L04AC07 |           | √       |       | √     |
| suxamethonium                 | M03AB01 | √         |         |       |       |
| atracurium                    | M03AC04 | √         |         |       |       |
| propofol                      | N01AX10 | √         |         |       |       |

| Active substance    |         |      | Guideline |       |       |
|---------------------|---------|------|-----------|-------|-------|
| Name                | ATC-5   | PAHO | Austria   | Italy | Spain |
| morphine            | N02AA01 | √    |           |       |       |
| fentanyl            | N02AB03 | √    |           |       |       |
| paracetamol         | N02BE01 | √    |           |       |       |
| haloperidol         | N05AD01 | √    |           |       |       |
| lorazepam           | N05BA06 | √    |           |       |       |
| midazolam           | N05CD08 | √    |           |       |       |
| hydroxychloroquine  | P01BA02 |      | √         | √     | √     |
| ipratropium bromide | R01AX03 | √    |           |       |       |
| salbutamol          | R03AC02 | √    |           |       |       |
| oxygen              | V03AN01 | √    | √         | √     | √     |

<sup>1</sup> In the PAHO recommendations and the Austrian guideline “saline solution” was indicated which can also include salt solutions (B05CB) such as sodium citrate, magnesium citrate, sodium bicarbonate and combinations.

**Supplementary File S2:**

**Medicines (listed per ATC-5) recommended for the treatment of COVID-19 symptoms in guidelines as of March 2020 and further active substances of the same chemical group (ATC-4 group)**

| Active substance recommended for treatment of COVID-19 symptoms |         | ATC-4 code | Further substances in this ATC-4 group                                                                                                                                   |
|-----------------------------------------------------------------|---------|------------|--------------------------------------------------------------------------------------------------------------------------------------------------------------------------|
| Name                                                            | ATC-5   |            |                                                                                                                                                                          |
| ranitidine (EM)                                                 | A02BA02 | A02BA      | cimetidine<br>famotidine<br>nizatidine<br>niperotidine<br>roxatidine<br>ranitidine bismuth citrate<br>lafutidine<br>cimetidine, combinations<br>famotidine, combinations |
| omeprazole (EM)                                                 | A02BC01 | A02BC      | pantoprazole<br>rabeprazole<br>esomeprazole<br>dexlansoprazole<br>dexrabeprazole<br>vonoprazan<br>tegoprazan<br>lansoprazole, combinations<br>rabeprazole, combinations  |
| atropine (EM)                                                   | A03BA01 | A03BA      | hyoscyamine<br>belladonna total alkaloids                                                                                                                                |
| metoclopramide (EM)                                             | A03FA01 | A03FA      | cisapride<br>domperidone<br>bromopride<br>alzapride<br>clebopride<br>itopride<br>cinitapride<br>mosapride                                                                |
| ondansetron (EM)                                                | A04AA01 | A04AA      | granisetron (EM)<br>tropisetron (EM)<br>dolasetron (EM)<br>palonosetron (EM)<br>palonosetron, combinations                                                               |
| heparin (EM)                                                    | B01AB01 | B01AB      | antithrombin III<br>dalteparin (EM)<br>nadroparin (EM)<br>parnaparin<br>reviparin<br>danaparoid<br>tinzaparin<br>sulodexide<br>bemiparin<br>heparin, combinations        |
| enoxaparin (EM)                                                 | B01AB05 |            |                                                                                                                                                                          |
| sodium chloride (EM) <sup>1</sup>                               | B05XA03 | B05XA      | potassium chloride (EM)                                                                                                                                                  |

| Active substance recommended for treatment of COVID-19 symptoms |         | ATC-4 code | Further substances in this ATC-4 group                                                                                                                                                                                                                                                                                                                                                                                                                                   |
|-----------------------------------------------------------------|---------|------------|--------------------------------------------------------------------------------------------------------------------------------------------------------------------------------------------------------------------------------------------------------------------------------------------------------------------------------------------------------------------------------------------------------------------------------------------------------------------------|
| Name                                                            | ATC-5   |            |                                                                                                                                                                                                                                                                                                                                                                                                                                                                          |
| potassium lactate                                               | B05XA15 |            | sodium bicarbonate<br>ammonium chloride<br>magnesium sulfate (EM)<br>potassium phosphate, incl. combinations with other potassium salts<br>calcium chloride<br>sodium acetate<br>sodium phosphate<br>magnesium phosphate<br>magnesium chloride<br>zinc chloride<br>hydrochloric acid<br>sodium glycerophosphate<br>cardioplegia solutions<br>potassium acetate<br>zinc sulfate (EM)<br>combinations of electrolytes (EM)<br>electrolytes in combination with other drugs |
| norepinephrine                                                  | C01CA03 | C01CA      | etilefrine<br>isoprenaline<br>norepinephrine<br>dopamine (EM)<br>phenylephrine<br>oxedrine<br>metaraminol<br>methoxamine<br>mephentermine<br>dimetofrine<br>prenalterol<br>dopexamine<br>gepefrine<br>ibopamine<br>midodrine<br>octopamine<br>fenoldopam<br>cafedrine<br>arbutamine<br>theodrenaline<br>amezinium metilsulfate<br>ephedrine (EM)<br>droxidopa<br>combinations<br>etilefrine, combinations                                                                |
| dobutamine                                                      | C01CA07 |            |                                                                                                                                                                                                                                                                                                                                                                                                                                                                          |
| epinephrine (EM)                                                | C01CA24 |            |                                                                                                                                                                                                                                                                                                                                                                                                                                                                          |
| milrinone                                                       | C01CE02 | C01CE      | amrinone<br>enoximone<br>bucladesine                                                                                                                                                                                                                                                                                                                                                                                                                                     |
| levosimendan                                                    | C01CX08 | C01CX      | angiotensinamide<br>xamoterol<br>angiotensin II                                                                                                                                                                                                                                                                                                                                                                                                                          |

| Active substance recommended for treatment of COVID-19 symptoms |         | ATC-4 code | Further substances in this ATC-4 group                                                                                                                                                                                                                                           |
|-----------------------------------------------------------------|---------|------------|----------------------------------------------------------------------------------------------------------------------------------------------------------------------------------------------------------------------------------------------------------------------------------|
| Name                                                            | ATC-5   |            |                                                                                                                                                                                                                                                                                  |
| chlorhexidine (EM)                                              | D08AC02 | D08AC      | dibrompropamide<br>propamide<br>hexamide<br>polihexanide<br>chlorhexidine, combinations                                                                                                                                                                                          |
| povidone-iodine (EM)                                            | D08AG02 | D08AG      | iodine/octylphenoxypolyglycoether<br>iodine (EM)<br>diiodohydroxypropane                                                                                                                                                                                                         |
| ethanol (EM)                                                    | D08AX08 | D08AX      | hydrogen peroxide<br>eosin<br>propanol (EM)<br>tosylchloramide sodium<br>isopropanol<br>potassium permanganate (EM)<br>sodium hypochlorite<br>propanol, combinations                                                                                                             |
| dexamethasone (EM)                                              | H02AB02 | H02AB      | betamethasone (EM)<br>fluocortolone<br>paramethasone<br>prednisolone (EM)<br>prednisone (EM)<br>triamcinolone<br>cortisone<br>prednylidene<br>rimexolone<br>deflazacort<br>cloprednol<br>meprednisone<br>cortivazol                                                              |
| methylprednisolone (EM)                                         | H02AB04 |            |                                                                                                                                                                                                                                                                                  |
| hydrocortisone (EM)                                             | H02AB09 |            |                                                                                                                                                                                                                                                                                  |
| amoxicillin / clavulanic acid (EM)                              | J01CR02 | J01CR      | ampicillin and beta-lactamase inhibitor<br>amoxicillin and beta-lactamase inhibitor (other than clavulanic acid)<br>ticarcillin and beta-lactamase inhibitor<br>sultamicillin<br>piperacillin and beta-lactamase inhibitor other than tazobactam)<br>combinations of penicillins |
| piperacillin / tazobactam (EM)                                  | J01CR05 |            |                                                                                                                                                                                                                                                                                  |

| Active substance recommended for treatment of COVID-19 symptoms |         | ATC-4 code | Further substances in this ATC-4 group                                                                                                                                                                                                                                                                                                                                                                                                                                             |
|-----------------------------------------------------------------|---------|------------|------------------------------------------------------------------------------------------------------------------------------------------------------------------------------------------------------------------------------------------------------------------------------------------------------------------------------------------------------------------------------------------------------------------------------------------------------------------------------------|
| Name                                                            | ATC-5   |            |                                                                                                                                                                                                                                                                                                                                                                                                                                                                                    |
| ceftazidime (EM)                                                | J01DD02 | J01DD      | cefotaxime (EM)<br>cefsulodin<br>cefmenoxime<br>latamoxef<br>ceftizoxime<br>cefixime (EM)<br>cefodizime<br>cefetamet<br>cefpiramide<br>cefoperazone<br>cefpodoxime<br>cefibuten<br>cefdinir<br>cefcapene<br>cefteram<br>cefotaxime and beta-lactamase inhibitor<br>ceftazidime and beta-lactamase inhibitor (EM)<br>ceftriaxone, combinations<br>cefoperazone and beta-lactamase inhibitor<br>ceftriaxone and beta-lactamase inhibitor<br>cefpodoxime and beta-lactamase inhibitor |
| ceftriaxone (EM)                                                | J01DD04 |            |                                                                                                                                                                                                                                                                                                                                                                                                                                                                                    |
| cefditoren                                                      | J01DD16 |            |                                                                                                                                                                                                                                                                                                                                                                                                                                                                                    |
| meropenem (EM)                                                  | J01DH02 | J01DH      | ertapenem<br>doripenem<br>biapenem<br>tebipenem pivoxil<br>imipenem and cilastatin<br>meropenem and vaborbactam<br>panipenem and betamipron<br>imipenem, cilastatin and relebactam                                                                                                                                                                                                                                                                                                 |
| ceftaroline                                                     | J01DI02 | J01DI      | ceftobiprole medocaril<br>faropenem<br>cefiderocol (EM)<br>ceftolozane and beta-lactamase inhibitor                                                                                                                                                                                                                                                                                                                                                                                |
| clarithromycin (EM)                                             | J01FA09 | J01FA      | erythromycin (EM)<br>spiramycin<br>midecamycin<br>oleandomycin<br>roxithromycin<br>josamycin<br>troleandomycin<br>miocamycin<br>rokitamycin<br>dirithromycin<br>flurithromycin<br>telithromycin<br>solithromycin                                                                                                                                                                                                                                                                   |
| azithromycin (EM)                                               | J01FA10 |            |                                                                                                                                                                                                                                                                                                                                                                                                                                                                                    |

| Active substance recommended for treatment of COVID-19 symptoms |         | ATC-4 code | Further substances in this ATC-4 group                                                                                                                                                                                                                                                                                                                           |
|-----------------------------------------------------------------|---------|------------|------------------------------------------------------------------------------------------------------------------------------------------------------------------------------------------------------------------------------------------------------------------------------------------------------------------------------------------------------------------|
| Name                                                            | ATC-5   |            |                                                                                                                                                                                                                                                                                                                                                                  |
| amikacin (EM)                                                   | J01GB06 | J01GB      | tobramycin (EM)<br>gentamicin (EM)<br>kanamycin (EM)<br>neomycin<br>netilmicin (EM)<br>sisomicin<br>dibekacin<br>ribostamycin<br>isepamicin<br>arbekacin<br>bekanamycin<br>plazomicin (EM)                                                                                                                                                                       |
| levofloxacin (EM)                                               | J01MA12 | J01MA      | ofloxacin (EM)<br>ciprofloxacin (EM)<br>pefloxacin<br>enoxacin<br>temafloxacin<br>norfloxacin<br>lomefloxacin<br>fleroxacin<br>sparfloxacin<br>rufloxacin<br>grepafloxacin<br>trovafloxacin<br>gemifloxacin<br>gatifloxacin<br>prulifloxacin<br>pazufloxacin<br>garenoxacin<br>sitafloxacin<br>tosufloxacin<br>delafloracin<br>levonadifloxacin<br>lascufloxacin |
| moxifloxacin (EM)                                               | J01MA14 |            |                                                                                                                                                                                                                                                                                                                                                                  |
| vancomycin (EM)                                                 | J01XA01 | J01XA      | teicoplanin<br>telavancin<br>dalbavancin<br>oritavancin                                                                                                                                                                                                                                                                                                          |
| amphotericin B (EM)                                             | J02AA01 | J02AA      | hachimycin                                                                                                                                                                                                                                                                                                                                                       |
| remdesivir                                                      | J05AB16 | J05AB      | aciclovir (EM)<br>idoxuridine<br>vidarabine<br>ganciclovir<br>famciclovir<br>valaciclovir (EM)<br>cidofovir<br>penciclovir<br>valganciclovir (EM)<br>brivudine<br>brincidofovir                                                                                                                                                                                  |

| Active substance recommended for treatment of COVID-19 symptoms |         | ATC-4 code | Further substances in this ATC-4 group                                                                                                                                                                                                                                                                                                                                                                                                                                                                                                                                                                                                                                                                                                                                                                                                                                                                                                                                                                                                                                                                                                                                    |
|-----------------------------------------------------------------|---------|------------|---------------------------------------------------------------------------------------------------------------------------------------------------------------------------------------------------------------------------------------------------------------------------------------------------------------------------------------------------------------------------------------------------------------------------------------------------------------------------------------------------------------------------------------------------------------------------------------------------------------------------------------------------------------------------------------------------------------------------------------------------------------------------------------------------------------------------------------------------------------------------------------------------------------------------------------------------------------------------------------------------------------------------------------------------------------------------------------------------------------------------------------------------------------------------|
| Name                                                            | ATC-5   |            |                                                                                                                                                                                                                                                                                                                                                                                                                                                                                                                                                                                                                                                                                                                                                                                                                                                                                                                                                                                                                                                                                                                                                                           |
| oseltamivir (EM)                                                | J05AH02 | J05AH      | zanamivir<br>peramivir<br>laninamivir                                                                                                                                                                                                                                                                                                                                                                                                                                                                                                                                                                                                                                                                                                                                                                                                                                                                                                                                                                                                                                                                                                                                     |
| lopinavir / ritonavir (EM)                                      | J05AR10 | J05AR      | zidovudine and lamivudine<br>lamivudine and abacavir (EM)<br>tenofovir disoproxil and emtricitabine<br>zidovudine, lamivudine and abacavir<br>zidovudine, lamivudine and nevirapine<br>emtricitabine, tenofovir disoproxil and efavirenz<br>stavudine, lamivudine and nevirapine<br>emtricitabine, tenofovir disoproxil and rilpivirine<br>emtricitabine, tenofovir disoproxil, elvitegravir and cobicistat<br>lamivudine, tenofovir disoproxil and efavirenz<br>lamivudine and tenofovir disoproxil<br>lamivudine, abacavir and dolutegravir<br>darunavir and cobicistat<br>atazanavir and cobicistat<br>lamivudine and raltegravir<br>emtricitabine and tenofovir alafenamide<br>emtricitabine, tenofovir alafenamide, elvitegravir and cobicistat<br>emtricitabine, tenofovir alafenamide and rilpivirine<br>emtricitabine, tenofovir alafenamide and bictegravir<br>dolutegravir and rilpivirine<br>emtricitabine, tenofovir alafenamide, darunavir and cobicistat<br>atazanavir and ritonavir (EM)<br>lamivudine, tenofovir disoproxil and doravirine<br>lamivudine and dolutegravir<br>darunavir and ritonavir<br>lamivudine, tenofovir disoproxil and dolutegravir |
| favipiravir                                                     | J05AX27 | J05AX      | moroxydine<br>lysozyme<br>inosine pranobex<br>pleconaril<br>enfuvirtide<br>maraviroc<br>maribavir<br>umifenovir<br>enisamium iodide<br>letermovir<br>tilorone<br>pentanedioic acid imidazolyl ethanamide<br>ibalizumab<br>tecovirimat<br>baloxavir marboxil<br>amenamavir<br>bulevirtide<br>fostemsavir<br>lenacapavir                                                                                                                                                                                                                                                                                                                                                                                                                                                                                                                                                                                                                                                                                                                                                                                                                                                    |



| Active substance recommended for treatment of COVID-19 symptoms |         | ATC-4 code | Further substances in this ATC-4 group                                                                                                                                                                                                                                                                                                                                                                                                                              |
|-----------------------------------------------------------------|---------|------------|---------------------------------------------------------------------------------------------------------------------------------------------------------------------------------------------------------------------------------------------------------------------------------------------------------------------------------------------------------------------------------------------------------------------------------------------------------------------|
| Name                                                            | ATC-5   |            |                                                                                                                                                                                                                                                                                                                                                                                                                                                                     |
| interferon beta-1b                                              | L03AB08 | L03AB      | interferon alfa natural<br>interferon beta natural<br>interferon gamma<br>interferon alfa-2a<br>interferon alfa-2b<br>interferon alfa-n1<br>interferon beta-1a<br>interferon alfacon-1<br>peginterferon alfa-2b (EM)<br>peginterferon alfa-2a (EM)<br>albinterferon alfa-2b<br>peginterferon beta-1a<br>cepeginterferon alfa-2b<br>ropeginterferon alfa-2b<br>peginterferon alfacon-2<br>peginterferon alfa-2b, combinations<br>peginterferon alfa-2a, combinations |
| anakinra                                                        | L04AC03 | L04AC      | daclizumab<br>basiliximab<br>rilonacept<br>ustekinumab<br>canakinumab<br>briakinumab<br>secukinumab<br>siltuximab<br>brodalumab<br>ixekizumab<br>sarilumab<br>sirukumab<br>guselkumab<br>tildrakizumab<br>risankizumab<br>satralizumab<br>netakimab<br>bimekizumab<br>spesolimab                                                                                                                                                                                    |
| tocilizumab                                                     | L04AC07 |            |                                                                                                                                                                                                                                                                                                                                                                                                                                                                     |
| suxamethonium (EM)                                              | M03AB01 | M03AB      | <i>no further active substances</i>                                                                                                                                                                                                                                                                                                                                                                                                                                 |
| atracurium (EM)                                                 | M03AC04 | M03AC      | pancuronium<br>gallamine<br>vecuronium (EM)<br>hexafluronium<br>pipecuronium bromide<br>doxacurium chloride<br>fazadinium bromide<br>rocuronium bromide<br>mivacurium chloride<br>cisatracurium                                                                                                                                                                                                                                                                     |

| Active substance recommended for treatment of COVID-19 symptoms |         | ATC-4 code | Further substances in this ATC-4 group                                                                                                                                                                                                                                                                                                               |
|-----------------------------------------------------------------|---------|------------|------------------------------------------------------------------------------------------------------------------------------------------------------------------------------------------------------------------------------------------------------------------------------------------------------------------------------------------------------|
| Name                                                            | ATC-5   |            |                                                                                                                                                                                                                                                                                                                                                      |
| propofol (EM)                                                   | N01AX10 | N01AX      | ketamine (EM)<br>propanidid<br>alfaxalone<br>etomidate<br>sodium oxybate<br>nitrous oxide (EM)<br>esketamine<br>xenon<br>nitrous oxide, combinations                                                                                                                                                                                                 |
| morphine (EM)                                                   | N02AA01 | N02AA      | opium<br>hydromorphone (EM)<br>nicomorphine<br>oxycodone (EM)<br>dihydrocodeine<br>papaveretum<br>oxymorphone<br>morphine, combinations<br>hydromorphone and naloxone<br>oxycodone and naloxone<br>oxycodone and naltrexone<br>dihydrocodeine, combinations<br>codeine, combinations excl. psycholeptics<br>codeine, combinations with psycholeptics |
| fentanyl (EM)                                                   | N02AB03 | N02AB      | ketobemidone<br>pethidine<br>pethidine, combinations excl. psycholeptics<br>pethidine, combinations with psycholeptics                                                                                                                                                                                                                               |
| paracetamol (EM)                                                | N02BE01 | N02BE      | phenacetin<br>bucetin<br>propacetamol<br>paracetamol, combinations excl. psycholeptics<br>phenacetin, combinations excl. psycholeptics<br>bucetin, combinations excl. psycholeptics<br>paracetamol, combinations with psycholeptics<br>phenacetin, combinations with psycholeptics<br>bucetin, combinations with psycholeptics                       |
| haloperidol (EM)                                                | N05AD01 | N05AD      | trifluoperidol<br>melperone<br>moperone<br>pipamperone<br>bromperidol<br>benperidol<br>droperidol<br>fluanisone<br>lumateperone                                                                                                                                                                                                                      |

| Active substance recommended for treatment of COVID-19 symptoms |         | ATC-4 code | Further substances in this ATC-4 group                                                                                                                                                                                                                                                                                                                                  |
|-----------------------------------------------------------------|---------|------------|-------------------------------------------------------------------------------------------------------------------------------------------------------------------------------------------------------------------------------------------------------------------------------------------------------------------------------------------------------------------------|
| Name                                                            | ATC-5   |            |                                                                                                                                                                                                                                                                                                                                                                         |
| lorazepam (EM)                                                  | N05BA06 | N05BA      | diazepam (EM)<br>chlordiazepoxide<br>medazepam<br>oxazepam<br>potassium clorazepate<br>adinazolam<br>bromazepam<br>clobazam<br>ketazolam<br>prazepam<br>alprazolam<br>halazepam<br>pinazepam<br>camazepam<br>nordazepam<br>fludiazepam<br>ethyl loflazepate<br>etizolam<br>clotiazepam<br>cloxazolam<br>tofisopam<br>bentazepam<br>mexazolam<br>lorazepam, combinations |
| midazolam (EM)                                                  | N05CD08 | N05CD      | flurazepam<br>nitrazepam<br>flunitrazepam<br>estazolam<br>triazolam<br>lormetazepam<br>temazepam<br>brotizolam<br>quazepam<br>loprazolam<br>doxefazepam<br>cinolazepam<br>remimazolam<br>nimetazepam                                                                                                                                                                    |
| ipratropium bromide (EM)                                        | R01AX03 | R01AX      | calcium hexamine thiocyanate<br>retinol (EM)<br>ritiometan<br>mupirocin (EM)<br>hexamidine<br>framycetin<br>hyaluronic acid<br>various<br>combinations                                                                                                                                                                                                                  |

| Active substance recommended for treatment of COVID-19 symptoms |         | ATC-4 code | Further substances in this ATC-4 group                                                                                                                                                                                                      |
|-----------------------------------------------------------------|---------|------------|---------------------------------------------------------------------------------------------------------------------------------------------------------------------------------------------------------------------------------------------|
| Name                                                            | ATC-5   |            |                                                                                                                                                                                                                                             |
| salbutamol (EM)                                                 | R03AC02 | R03AC      | fenoterol<br>rimiterol<br>hexoprenaline<br>isoetarin<br>pirbuterol<br>tretoquinol<br>carbutoleol<br>tulobuterol<br>salmeterol (EM)<br>formoterol (EM)<br>clenbuterol<br>reproterol<br>procaterol<br>bitolterol<br>indacaterol<br>olodaterol |
| oxygen (EM)                                                     | V03AN01 | V03AN      | carbon dioxide<br>helium<br>nitrogen<br>medical air                                                                                                                                                                                         |

EM = classified as essential medicine by the World Health Organization (<https://apps.who.int/iris/rest/bit-streams/1145259/retrieve>)

**Supplementary File S3:**
**Shortage notifications for medicines to treat COVID-19 symptoms and further active substances of the same chemical group (ATC-4 group)**

| Medicine                    |         | Included in |    | Country | Shortage notifications |           |           |           |
|-----------------------------|---------|-------------|----|---------|------------------------|-----------|-----------|-----------|
| Active substance            | ATC-5   | EML         | GL |         | 02 / 2020              | 03 / 2020 | 04 / 2020 | 11 / 2021 |
| famotidine                  | A02BA03 | N           | N  | AT      | -                      | -         | 2         | -         |
|                             |         |             |    | IT      | -                      | -         | -         | -         |
|                             |         |             |    | ES      | -                      | -         | -         | -         |
| omeprazole                  | A02BC01 | Y           | Y  | AT      | -                      | -         | -         | 2         |
|                             |         |             |    | IT      | -                      | -         | -         | -         |
|                             |         |             |    | ES      | 1                      | 3         | 2         | -         |
| pantoprazole                | A02BC02 | N           | N  | AT      | -                      | 1         | 1         | -         |
|                             |         |             |    | IT      | 2                      | 1         | 1         | 1         |
|                             |         |             |    | ES      | 1                      | -         | -         | -         |
| lansoprazole                | A02BC03 | N           | N  | AT      | -                      | -         | -         | -         |
|                             |         |             |    | IT      | -                      | -         | -         | 1         |
|                             |         |             |    | ES      | -                      | -         | -         | -         |
| rabeprazole                 | A02BC04 | N           | N  | AT      | -                      | -         | 1         | -         |
|                             |         |             |    | IT      | -                      | -         | -         | -         |
|                             |         |             |    | ES      | -                      | -         | -         | -         |
| esomeprazole                | A02BC05 | N           | N  | AT      | -                      | -         | 1         | -         |
|                             |         |             |    | IT      | 1                      | -         | 1         | -         |
|                             |         |             |    | ES      | -                      | -         | -         | -         |
| ondansetron                 | A04AA01 | Y           | Y  | AT      | -                      | -         | -         | -         |
|                             |         |             |    | IT      | -                      | -         | 1         | -         |
|                             |         |             |    | ES      | 1                      | 2         | 2         | -         |
| granisetron                 | A04AA02 | Y           | N  | AT      | -                      | -         | 1         | -         |
|                             |         |             |    | IT      | -                      | -         | -         | -         |
|                             |         |             |    | ES      | 2                      | -         | -         | -         |
| heparin                     | B01AB01 | Y           | Y  | AT      | -                      | -         | -         | -         |
|                             |         |             |    | IT      | -                      | -         | -         | 1         |
|                             |         |             |    | ES      | -                      | -         | -         | -         |
| enoxaparin                  | B01AB05 | N           | N  | AT      | -                      | -         | -         | -         |
|                             |         |             |    | IT      | -                      | -         | -         | -         |
|                             |         |             |    | ES      | -                      | -         | 5         | -         |
| sodium bicarbonate          | B05XA02 | N           | N  | AT      | -                      | -         | -         | -         |
|                             |         |             |    | IT      | -                      | -         | -         | -         |
|                             |         |             |    | ES      | -                      | -         | 1         | -         |
| sodium chloride             | B05XA03 | Y           | Y  | AT      | -                      | -         | 1         | -         |
|                             |         |             |    | IT      | -                      | -         | -         | -         |
|                             |         |             |    | ES      | -                      | -         | -         | 1         |
| chlorhexidine, combinations | D08AC52 | N           | N  | AT      | -                      | -         | -         | -         |
|                             |         |             |    | IT      | -                      | -         | -         | -         |
|                             |         |             |    | ES      | -                      | 1         | 3         | -         |
| ethanol                     | D08AX08 | Y           | Y  | AT      | -                      | -         | -         | -         |
|                             |         |             |    | IT      | -                      | -         | -         | -         |
|                             |         |             |    | ES      | -                      | -         | 2         | -         |
| dexamethasone               | H02AB02 | Y           | Y  | AT      | -                      | -         | 1         | -         |
|                             |         |             |    | IT      | -                      | -         | -         | -         |
|                             |         |             |    | ES      | -                      | -         | -         | -         |

| Medicine                      |         | Included in |    | Country | Shortage notifications |           |           |           |
|-------------------------------|---------|-------------|----|---------|------------------------|-----------|-----------|-----------|
| Active substance              | ATC-5   | EML         | GL |         | 02 / 2020              | 03 / 2020 | 04 / 2020 | 11 / 2021 |
| methylprednisolone            | H02AB04 | Y           | Y  | AT      | -                      | -         | -         | 1         |
|                               |         |             |    | IT      | -                      | 2         | -         | -         |
|                               |         |             |    | ES      | -                      | -         | 1         | -         |
| prednisone                    | H02AB07 | Y           | N  | AT      | -                      | -         | -         | -         |
|                               |         |             |    | IT      | -                      | -         | -         | -         |
|                               |         |             |    | ES      | -                      | -         | 2         | -         |
| hydrocortisone                | H02AB09 | Y           | N  | AT      | -                      | -         | -         | -         |
|                               |         |             |    | IT      | -                      | -         | -         | -         |
|                               |         |             |    | ES      | -                      | 1         | 1         | -         |
| amoxicillin / clavulanic acid | J01CR02 | Y           | N  | AT      | 1                      | 2         | 1         | -         |
|                               |         |             |    | IT      | -                      | -         | -         | -         |
|                               |         |             |    | ES      | -                      | -         | 1         | -         |
| piperacillin / tazobactam     | J01CR05 | Y           | Y  | AT      | -                      | -         | -         | -         |
|                               |         |             |    | IT      | -                      | -         | -         | -         |
|                               |         |             |    | ES      | -                      | 2         | 1         | -         |
| combinations of penicillins   | J01CR50 | Y           | N  | AT      | -                      | -         | 4         | -         |
|                               |         |             |    | IT      | -                      | -         | -         | -         |
|                               |         |             |    | ES      | -                      | -         | -         | -         |
| cefotaxime                    | J01DD01 | Y           | N  | AT      | -                      | -         | -         | -         |
|                               |         |             |    | IT      | -                      | -         | -         | 3         |
|                               |         |             |    | ES      | -                      | -         | -         | -         |
| ceftazidime                   | J01DD02 | Y           | Y  | AT      | -                      | -         | -         | -         |
|                               |         |             |    | IT      | -                      | -         | -         | -         |
|                               |         |             |    | ES      | -                      | 1         | -         | -         |
| cefixime                      | J01DD08 | Y           | N  | AT      | -                      | -         | -         | -         |
|                               |         |             |    | IT      | -                      | -         | -         | -         |
|                               |         |             |    | ES      | -                      | -         | 1         | -         |
| cefditoren                    | J01DD16 | N           | Y  | AT      | -                      | -         | -         | -         |
|                               |         |             |    | IT      | -                      | -         | -         | -         |
|                               |         |             |    | ES      | -                      | -         | 1         | -         |
| roxithromycin                 | J01FA06 | N           | N  | AT      | -                      | -         | -         | -         |
|                               |         |             |    | IT      | 1                      | 1         | -         | -         |
|                               |         |             |    | ES      | -                      | -         | -         | -         |
| clarithromycin                | J01FA09 | Y           | Y  | AT      | -                      | -         | -         | -         |
|                               |         |             |    | IT      | -                      | -         | 2         | 4         |
|                               |         |             |    | ES      | -                      | 2         | -         | -         |
| azithromycin                  | J01FA10 | Y           | Y  | AT      | -                      | -         | -         | -         |
|                               |         |             |    | IT      | -                      | -         | -         | 2         |
|                               |         |             |    | ES      | -                      | 3         | 2         | -         |
| ciprofloxacin                 | J01MA02 | Y           | N  | AT      | -                      | -         | 1         | 1         |
|                               |         |             |    | IT      | -                      | 1         | -         | 1         |
|                               |         |             |    | ES      | -                      | -         | -         | -         |
| levofloxacin                  | J01MA12 | Y           | Y  | AT      | -                      | -         | -         | -         |
|                               |         |             |    | IT      | -                      | -         | -         | -         |
|                               |         |             |    | ES      | -                      | 2         | 1         | -         |
| moxifloxacin                  | J01MA14 | Y           | Y  | AT      | -                      | -         | -         | -         |
|                               |         |             |    | IT      | -                      | -         | -         | -         |
|                               |         |             |    | ES      | -                      | 1         | -         | 1         |

| Medicine                  |         | Included in |    | Country | Shortage notifications |           |           |           |
|---------------------------|---------|-------------|----|---------|------------------------|-----------|-----------|-----------|
| Active substance          | ATC-5   | EML         | GL |         | 02 / 2020              | 03 / 2020 | 04 / 2020 | 11 / 2021 |
| vancomycin                | J01XA01 | Y           | Y  | AT      |                        |           |           |           |
|                           |         |             |    | IT      | -                      | -         | -         | -         |
|                           |         |             |    | ES      | -                      | -         | -         | 1         |
| oseltamivir               | J05AH02 | Y           | Y  | AT      | -                      | 1         | -         | -         |
|                           |         |             |    | IT      | -                      | -         | -         | -         |
|                           |         |             |    | ES      | -                      | -         | -         | -         |
| lamivudine /<br>abacavir  | J05AR02 | N           | N  | AT      | -                      | -         | 1         | -         |
|                           |         |             |    | IT      | -                      | -         | 1         | 1         |
|                           |         |             |    | ES      | -                      | -         | -         | -         |
| lopinavir /<br>ritonavir  | J05AR10 | Y           | Y  | AT      | -                      | -         | -         | -         |
|                           |         |             |    | IT      | -                      | 5         | -         | 1         |
|                           |         |             |    | ES      | -                      | -         | -         | -         |
| darunavir /<br>cobicistat | J05AR14 | N           | N  | AT      | -                      | -         | -         | -         |
|                           |         |             |    | IT      | -                      | 1         | -         | -         |
|                           |         |             |    | ES      | -                      | -         | -         | -         |
| tocilizumab               | L04AC07 | N           | Y  | AT      | -                      | -         | -         | -         |
|                           |         |             |    | IT      | -                      | -         | 1         | -         |
|                           |         |             |    | ES      | -                      | -         | -         | -         |
| suxamethonium             | M03AB01 | Y           | Y  | AT      | -                      | -         | -         | -         |
|                           |         |             |    | IT      | -                      | -         | -         | -         |
|                           |         |             |    | ES      | -                      | -         | 1         | -         |
| atracurium                | M03AC04 | Y           | Y  | AT      | -                      | -         | -         | -         |
|                           |         |             |    | IT      | -                      | 4         | -         | -         |
|                           |         |             |    | ES      | -                      | 1         | -         | -         |
| rocuronium<br>bromide     | M03AC09 | N           | N  | AT      | -                      | -         | 1         | -         |
|                           |         |             |    | IT      | -                      | 5         | 1         | 1         |
|                           |         |             |    | ES      | -                      | -         | 1         | -         |
| mivacurium<br>chloride    | M03AC10 | N           | N  | AT      | -                      | -         | -         | -         |
|                           |         |             |    | IT      | -                      | 1         | 1         | -         |
|                           |         |             |    | ES      | -                      | -         | -         | -         |
| cisatracurium             | M03AC11 | N           | N  | AT      | -                      | 1         | -         | -         |
|                           |         |             |    | IT      | -                      | 3         | 5         | -         |
|                           |         |             |    | ES      | -                      | 4         | -         | -         |
| propofol                  | N01AX10 | Y           | Y  | AT      | -                      | -         | -         | -         |
|                           |         |             |    | IT      | -                      | 9         | 2         | 2         |
|                           |         |             |    | ES      | 1                      | 4         | 4         | -         |
| morphine                  | N02AA01 | Y           | Y  | AT      | -                      | -         | -         | -         |
|                           |         |             |    | IT      | -                      | -         | 2         | -         |
|                           |         |             |    | ES      | -                      | 1         | -         | -         |
| fentanyl                  | N02AB03 | Y           | Y  | AT      | -                      | -         | -         | -         |
|                           |         |             |    | IT      | -                      | 5         | 4         | 1         |
|                           |         |             |    | ES      | -                      | 6         | -         | -         |
| paracetamol               | N02BE01 | Y           | Y  | AT      | -                      | -         | 7         | -         |
|                           |         |             |    | IT      | -                      | 2         | 9         | -         |
|                           |         |             |    | ES      | 3                      | 10        | 35        | 3         |
| haloperidol               | N05AD01 | Y           | Y  | AT      | -                      | -         | -         | -         |
|                           |         |             |    | IT      | -                      | -         | -         | -         |
|                           |         |             |    | ES      | -                      | 2         | -         | -         |

| Medicine         |         | Included in |    | Country | Shortage notifications |           |           |           |
|------------------|---------|-------------|----|---------|------------------------|-----------|-----------|-----------|
| Active substance | ATC-5   | EML         | GL |         | 02 / 2020              | 03 / 2020 | 04 / 2020 | 11 / 2021 |
| midazolam        | N05CD08 | Y           | Y  | AT      | -                      | -         | 4         | -         |
|                  |         |             |    | IT      | -                      | -         | 5         | -         |
|                  |         |             |    | ES      | -                      | -         | -         | -         |

AT = Austria, EML = WHO Model Essential Medicines List (information on whether, or not, a medicine has been in the WHO EML), ES = Spain, GL = guideline (information on whether, or not, a medicine has been included in at least one of the four reviewed guidelines), IT = Italy, N = no, Y = yes

Note: A notification is counted in the month in which the shortage was notified to start.



**Supplementary File S4:**  
**Background information retrieved from the shortage registers**

*Information on expected end dates as share of shortages notifications*

| End dates                      | Country | 1 <sup>st</sup> wave<br>(02-04/2020) | 4 <sup>th</sup> wave<br>(11/2021) | Total |
|--------------------------------|---------|--------------------------------------|-----------------------------------|-------|
| No expected end date indicated | Austria | 52%                                  | 75%                               | 54%   |
|                                | Italy   | 36%                                  | 32%                               | 35%   |
|                                | Spain   | 25%                                  | 17%                               | 24%   |

Austria: 33 shortages notifications – 1<sup>st</sup> wave, 4 – 4<sup>th</sup> wave, 37 – total

Italy: 80 – 1<sup>st</sup> wave, 19 – 4<sup>th</sup> wave, 99 – total

Spain: 122 – 1<sup>st</sup> wave, 6 – 4<sup>th</sup> wave, 128 – total

Data do not sum up to 100% as further options (e.g. shortages resolved in later months) are possible.

*Information on causes*

| <b>Austria</b>                                 | <b>1<sup>st</sup> wave</b> | <b>4<sup>th</sup> wave</b>                                                                                                                                          |
|------------------------------------------------|----------------------------|---------------------------------------------------------------------------------------------------------------------------------------------------------------------|
| <b>Causes for Austria</b>                      | <b>Total (n = 33)</b>      | <b>Total (n = 4)</b>                                                                                                                                                |
| Capacity constraints at the manufacturing site | 24%                        | No specific cause was provided for the 4 <sup>th</sup> wave; all included active substances targeted by a shortage notification indicated the reason “out of stock” |
| Delays in manufacturing                        | 21%                        |                                                                                                                                                                     |
| Increased demand                               | 33%                        |                                                                                                                                                                     |
| Other                                          | 9%                         |                                                                                                                                                                     |
| Prioritisation of supply to other countries    | 3%                         |                                                                                                                                                                     |
| Regulatory changes                             | 3%                         |                                                                                                                                                                     |
| Shortage of the active substance               | 6%                         |                                                                                                                                                                     |

”

| <b>Italy - 1<sup>st</sup> wave</b>            |               | <b>Italy - 4<sup>th</sup> wave</b>  |               |
|-----------------------------------------------|---------------|-------------------------------------|---------------|
| <b>Causes</b>                                 | <b>n = 80</b> | <b>Causes</b>                       | <b>n = 19</b> |
| High demand: quota distribution               | 1%            | High demand: discontinuous supplies | 5%            |
| Permanent marketing ceased                    | 14%           | Permanent marketing ceased          | 11%           |
| Increased demand                              | 60%           | Increased demand                    | 37%           |
| Production problems                           | 21%           | Production problems                 | 32%           |
| Reduced availability: contingent distribution | 4%            | Temporary marketing ceased          | 16%           |

Italy: slightly different categories indicated for the 1<sup>st</sup> wave and 4<sup>th</sup> wave

Spain: Information not included in the register

*Recommendation for alternatives*

Austria: Information not included in the register

Italy:

Existence of generic alternatives for 76% (n = 80) in the 1<sup>st</sup> wave, 84% (n = 19) in the 4<sup>th</sup> wave, 78% (n = 99) in total

Spain:

Existence of generic alternatives for 88% (n = 122); no such information available for the 4<sup>th</sup> wave
